# Supplementary material for: Characterization of the particle size distribution, mineralogy and Fe mode of occurrence of dust-emitting sediments across the Mojave Desert, California, USA
Source: Copernicus journal article supplement (doi:10.5194/egusphere-2024-434), 2024-02-27
Supplement: Supplementary file 1 [file egusphere-2024-434-supplement.pdf]

Supplementary

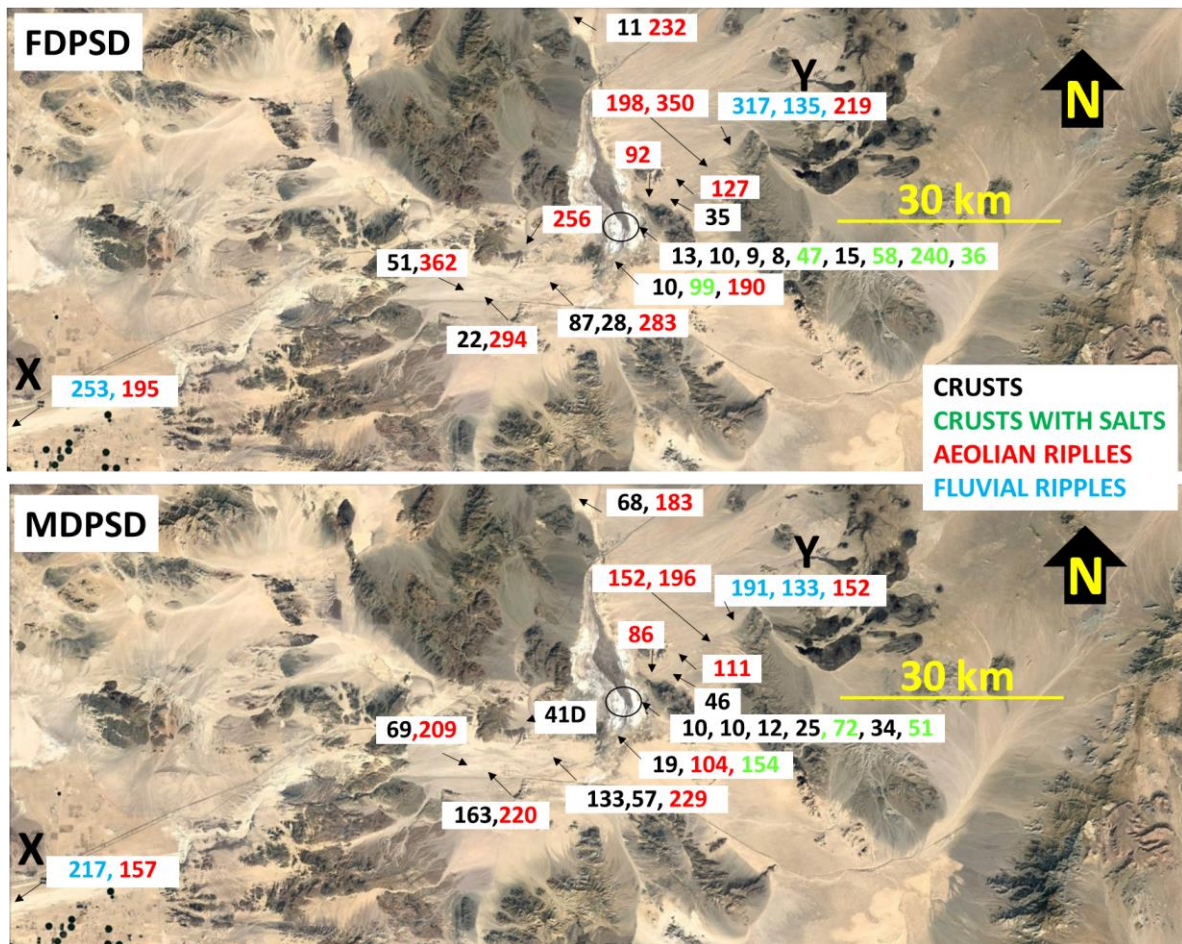

Figure S1: Soda Lake basin scale map with median particle diameter analysed with fully dispersed methodology (upper panel) and minimally dispersed methodology (lower panel) of different type of samples. Basemap: Imagery data from © Google Earth Pro v: 7.3.6.9345.

Table S1. Mean particle diameter from the samples of the Mojave Desert. N° indicates the number of the sample, Lat. is the latitude, Long. is the longitude. Type is the type of the sample being C: Crust and R: Ripple. Basin indicates the basin name where sample was obtained from. MDPSD is the minimally dispersed particle size distribution and FDPD is the Fully dispersed particle size distribution.

| N° | Lat.  | Long.   | Type | Basin    | mean diameter MDPSD ( $\mu\text{m}$ ) | mean diameter FDPD ( $\mu\text{m}$ ) |
|----|-------|---------|------|----------|---------------------------------------|--------------------------------------|
| 1  | 35.04 | -116.24 | C    | Soda     | 69                                    | 51                                   |
| 2  | 35.04 | -116.24 | R    | Soda     | 209                                   | 362                                  |
| 3  | 35.05 | -116.19 | C    | Soda     | 163                                   | 22                                   |
| 4  | 35.04 | -116.19 | R    | Soda     | 220                                   | 294                                  |
| 5  | 35.04 | -116.19 | C    | Soda     | 133                                   | 87                                   |
| 6  | 35.04 | -116.12 | R    | Soda     | 229                                   | 283                                  |
| 7  | 35.04 | -116.12 | C    | Soda     | 57                                    | 28                                   |
| 8  | 35.04 | -116.10 | C    | Soda     | 19                                    | 9.8                                  |
| 9  | 35.04 | -116.10 | C    | Soda     | 104                                   | 99                                   |
| 10 | 35.04 | -116.10 | R    | Soda     | 154                                   | 190                                  |
| 11 | 35.72 | -115.58 | C    | Mesquite | 64                                    | 91                                   |
| 12 | 35.72 | -115.58 | R    | Mesquite | 88                                    | 107                                  |
| 14 | 35.72 | -115.61 | C    | Mesquite | 313                                   | 46                                   |
| 15 | 35.72 | -115.61 | R    | Mesquite | 453                                   | 28                                   |
| 16 | 35.71 | -115.61 | C    | Mesquite | 138                                   | 16                                   |
| 17 | 35.71 | -115.61 | C    | Mesquite | 76                                    | 28                                   |
| 18 | 35.71 | -115.61 | C    | Mesquite | 35                                    | 14                                   |
| 19 | 35.70 | -115.60 | C    | Mesquite | 33                                    | 35                                   |
| 20 | 35.75 | -115.61 | C    | Mesquite | 180                                   | 11                                   |
| 21 | 35.54 | -115.41 | C    | Ivanpah  | 30                                    | 12                                   |
| 22 | 35.34 | -116.09 | C    | Soda     | 68                                    | 11                                   |
| 23 | 35.34 | -116.09 | R    | Soda     | 183                                   | 232                                  |
| 24 | 35.21 | -115.92 | R    | Soda     | 191                                   | 317                                  |

|    |       |         |   |         |         |     |
|----|-------|---------|---|---------|---------|-----|
| 25 | 35.21 | -115.92 | R | Soda    | 133     | 135 |
| 26 | 35.20 | -115.93 | R | Soda    | 152     | 219 |
| 27 | 35.17 | -115.98 | R | Soda    | 152     | 198 |
| 28 | 35.17 | -115.99 | R | Soda    | 196     | 351 |
| 29 | 35.16 | -116.03 | R | Soda    | 111     | 127 |
| 30 | 35.16 | -116.03 | C | Soda    | 46      | 35  |
| 31 | 35.16 | -116.03 | C | Soda    | 86      | 92  |
| 32 | 35.16 | -116.03 | C | Soda    | 10      | 13  |
| 33 | 35.16 | -116.04 | C | Soda    | 10      | 10  |
| 34 | 35.16 | -116.04 | C | Soda    | 12      | 9.2 |
| 35 | 35.16 | -116.04 | C | Soda    | 25      | 8.4 |
| 36 | 35.16 | -116.04 | C | Soda    | 72      | 47  |
| 37 | 35.15 | -116.06 | C | Soda    | 34      | 15  |
| 38 | 35.14 | -116.08 | C | Soda    | 51      | 58  |
| 39 | 35.13 | -116.10 | C | Soda    | Not An. | 240 |
| 40 | 35.13 | -116.10 | C | Soda    | Not An. | 136 |
| 41 | 35.12 | -116.11 | R | Soda    | 211     | 256 |
| 42 | 35.13 | -116.28 | C | Cronese | 24      | 9.4 |
| 43 | 35.13 | -116.28 | C | Cronese | 42      | 9.5 |
| 44 | 35.13 | -116.28 | C | Cronese | 67      | 8.2 |
| 45 | 35.12 | -116.28 | C | Cronese | 82      | 6.6 |
| 46 | 35.11 | -116.27 | C | Cronese | 49      | 20  |
| 47 | 35.11 | -116.27 | R | Cronese | 165     | 147 |
| 48 | 35.14 | -116.32 | C | Cronese | 123     | 13  |
| 49 | 35.14 | -116.32 | C | Cronese | 71      | 5.5 |
| 50 | 35.14 | -116.31 | R | Cronese | 220     | 77  |
| 51 | 35.14 | -116.29 | C | Cronese | 279     | 325 |
| 52 | 35.14 | -116.29 | C | Cronese | 167     | 4.9 |
| 53 | 35.07 | -116.73 | C | Coyote  | 79      | 8.4 |
| 54 | 35.07 | -116.73 | R | Coyote  | 153     | 156 |

|    |       |         |   |      |     |     |
|----|-------|---------|---|------|-----|-----|
| 55 | 34.91 | -116.68 | R | Soda | 217 | 253 |
| 56 | 34.91 | -116.68 | R | Soda | 157 | 195 |

Table S2. Summarised mineralogy of the samples in the Mojave Desert. Qtz: Quartz, Ab: Albite/Anorthite, Mc: Microcline, Mnt/Clc/Vrm: Montmorillonite/clinochlore/vermiculite, Ill: Illite, Amp: Amphibole, Lmt: Laumontite, Anl: Analcime, Cal: Calcite, Dol: Dolomite, Hal: Halite, The: Thenardite, Tro: Trona, Bur: Burkeite, Gp: Gypsum, Mgh: Maghemite, N<sup>o</sup> of sample indicates the sample number and can be correlated to other results with same n<sup>o</sup> of sample.

| N <sup>o</sup> | Qtz  | Ab   | Mc   | Kln | Mnt/<br>Clc/<br>Vrm | Ill  | Amp | Lmt  | Anl  | Cal  | Dol  | Hal  | The  | Tro  | Bur  | Gp   | Mgh  |
|----------------|------|------|------|-----|---------------------|------|-----|------|------|------|------|------|------|------|------|------|------|
| 1              | 25.6 | 30.1 | 8.6  | 3.7 | 4.4                 | 18.0 | 2.5 | <0.1 | <0.1 | 5.6  | <0.1 | <0.1 | <0.1 | <0.1 | <0.1 | <0.1 | 1.6  |
| 2              | 37.8 | 38.3 | 12.0 | 1.0 | 1.7                 | 4.6  | 2.9 | <0.1 | <0.1 | 1.1  | <0.1 | <0.1 | <0.1 | <0.1 | <0.1 | <0.1 | 0.6  |
| 3              | 30.5 | 24.9 | 11.1 | 3.5 | 4.7                 | 15.5 | 4.7 | <0.1 | <0.1 | 4.4  | <0.1 | <0.1 | <0.1 | <0.1 | <0.1 | <0.1 | 0.7  |
| 4              | 39.1 | 34.6 | 11.2 | 1.1 | 2.7                 | 5.6  | 3.9 | <0.1 | <0.1 | 1.1  | <0.1 | <0.1 | <0.1 | <0.1 | <0.1 | <0.1 | 0.8  |
| 5              | 31.9 | 33.6 | 8.9  | 2.0 | 6.0                 | 11.2 | 4.5 | <0.1 | <0.1 | 0.9  | <0.1 | <0.1 | <0.1 | <0.1 | <0.1 | <0.1 | 1.1  |
| 6              | 38.2 | 38.2 | 9.6  | 0.8 | 2.8                 | 4.6  | 5.2 | <0.1 | <0.1 | <0.1 | <0.1 | <0.1 | <0.1 | <0.1 | <0.1 | <0.1 | 0.6  |
| 7              | 17.5 | 21.1 | 8.5  | 8.0 | 7.6                 | 22.2 | 4.7 | 3.3  | <0.1 | 4.8  | <0.1 | <0.1 | <0.1 | <0.1 | <0.1 | <0.1 | 2.2  |
| 8              | 17.6 | 28.7 | 9.8  | 4.6 | 10.0                | 15.3 | 4.1 | 1.6  | <0.1 | 7.6  | <0.1 | <0.1 | <0.1 | <0.1 | <0.1 | <0.1 | 0.7  |
| 9              | 29.4 | 34.6 | 8.7  | 1.2 | 3.8                 | 5.8  | 6.9 | <0.1 | <0.1 | 2.3  | <0.1 | 6.6  | <0.1 | <0.1 | <0.1 | <0.1 | 0.8  |
| 10             | 35.5 | 40.1 | 10.7 | 0.5 | 4.2                 | 3.4  | 4.6 | <0.1 | <0.1 | 0.6  | <0.1 | <0.1 | <0.1 | <0.1 | <0.1 | <0.1 | 0.5  |
| 11             | 17.2 | 23.0 | 6.9  | 2.9 | 7.6                 | 13.9 | 4.0 | <0.1 | <0.1 | <0.1 | 6.9  | 14.4 | <0.1 | <0.1 | <0.1 | 2.3  | 0.9  |
| 12             | 20.1 | 21.4 | 8.8  | 2.5 | 0.1                 | 11.9 | 3.8 | <0.1 | <0.1 | 0.8  | 8.8  | 16.4 | <0.1 | <0.1 | <0.1 | 5.0  | 0.4  |
| 14             | 5.0  | <0.1 | <0.1 | 1.3 | <0.1                | 5.0  | 1.3 | <0.1 | <0.1 | <0.1 | <0.1 | 7.5  | <0.1 | <0.1 | <0.1 | 79.9 | <0.1 |
| 15             | <0.1 | <0.1 | <0.1 | 3.6 | <0.1                | 2.4  | 1.8 | <0.1 | <0.1 | <0.1 | <0.1 | 2.4  | <0.1 | <0.1 | <0.1 | 89.9 | <0.1 |

|    |      |      |      |      |      |      |     |      |      |      |      |      |      |      |      |      |      |
|----|------|------|------|------|------|------|-----|------|------|------|------|------|------|------|------|------|------|
| 16 | 7.4  | 22.1 | 3.7  | 1.2  | 0.7  | 8.6  | 2.5 | <0.1 | <0.1 | <0.1 | 12.3 | 30.6 | <0.1 | <0.1 | <0.1 | 11.0 | <0.1 |
| 17 | 16.1 | 15.5 | 3.6  | 3.0  | 1.3  | 5.9  | 4.2 | <0.1 | <0.1 | <0.1 | 17.8 | 29.7 | <0.1 | <0.1 | <0.1 | 3.0  | <0.1 |
| 18 | 16.3 | 25.6 | 9.3  | 4.1  | 1.4  | 17.5 | 4.7 | <0.1 | <0.1 | 1.5  | 10.6 | <0.1 | <0.1 | <0.1 | <0.1 | 7.0  | 2.0  |
| 19 | 21.4 | 21.9 | 6.9  | 4.6  | 1.6  | 11.5 | 5.5 | <0.1 | <0.1 | 16.2 | 9.5  | <0.1 | <0.1 | <0.1 | <0.1 | <0.1 | 0.9  |
| 20 | 12.1 | 24.3 | 8.7  | 2.3  | 2.3  | 14.5 | 4.0 | <0.1 | <0.1 | 6.4  | 24.3 | <0.1 | <0.1 | <0.1 | <0.1 | <0.1 | 1.2  |
| 21 | 15.1 | 29.7 | 5.8  | 7.0  | 6.4  | 24.4 | 3.5 | <0.1 | <0.1 | 5.2  | 1.6  | <0.1 | <0.1 | <0.1 | <0.1 | <0.1 | 1.2  |
| 22 | 20.3 | 31.5 | 9.6  | 6.6  | 5.6  | 15.5 | 4.2 | <0.1 | <0.1 | 4.8  | 0.7  | <0.1 | <0.1 | <0.1 | <0.1 | <0.1 | 1.2  |
| 23 | 38.1 | 36.9 | 9.2  | 1.2  | 1.0  | 5.8  | 6.9 | <0.1 | <0.1 | 0.7  | <0.1 | <0.1 | <0.1 | <0.1 | <0.1 | <0.1 | 0.2  |
| 24 | 31.1 | 46.8 | 13.1 | 0.9  | 0.5  | 4.1  | 2.9 | <0.1 | <0.1 | <0.1 | <0.1 | <0.1 | <0.1 | <0.1 | <0.1 | <0.1 | 0.4  |
| 25 | 33.8 | 42.0 | 8.2  | 2.1  | 2.5  | 5.4  | 5.1 | <0.1 | <0.1 | <0.1 | <0.1 | <0.1 | <0.1 | <0.1 | <0.1 | <0.1 | 1.0  |
| 26 | 30.6 | 50.1 | 10.6 | 0.6  | 1.4  | 2.6  | 3.5 | <0.1 | <0.1 | <0.1 | <0.1 | <0.1 | <0.1 | <0.1 | <0.1 | <0.1 | 0.6  |
| 27 | 35.7 | 46.4 | 9.2  | 1.2  | 0.5  | 3.5  | 3.1 | <0.1 | <0.1 | <0.1 | <0.1 | <0.1 | <0.1 | <0.1 | <0.1 | <0.1 | 0.4  |
| 28 | 43.8 | 35.5 | 10.7 | 0.6  | 3.2  | 4.1  | 1.9 | <0.1 | <0.1 | <0.1 | <0.1 | <0.1 | <0.1 | <0.1 | <0.1 | <0.1 | 0.2  |
| 29 | 30.9 | 44.7 | 9.7  | 0.8  | 2.7  | 4.6  | 4.9 | <0.1 | <0.1 | 0.9  | <0.1 | 0.6  | <0.1 | <0.1 | <0.1 | <0.1 | 0.1  |
| 30 | 22.2 | 36.8 | 10.6 | 4.9  | 4.4  | 13.0 | 4.5 | <0.1 | <0.1 | 1.5  | <0.1 | 1.4  | <0.1 | <0.1 | <0.1 | <0.1 | 0.8  |
| 31 | 26.2 | 44.3 | 8.9  | 2.2  | 1.8  | 5.8  | 5.8 | <0.1 | <0.1 | 2.6  | <0.1 | 1.7  | <0.1 | <0.1 | <0.1 | <0.1 | 0.6  |
| 32 | 15.1 | 29.5 | 9.3  | 5.8  | 6.5  | 19.2 | 4.7 | <0.1 | <0.1 | 7.6  | <0.1 | <0.1 | <0.1 | <0.1 | <0.1 | <0.1 | 2.3  |
| 33 | 16.2 | 33.2 | 11.7 | 4.9  | 3.8  | 19.2 | 4.1 | <0.1 | <0.1 | 4.7  | 0.9  | <0.1 | <0.1 | <0.1 | <0.1 | <0.1 | 1.2  |
| 34 | 12.3 | 30.0 | 6.9  | 4.6  | 5.6  | 19.9 | 3.7 | <0.1 | 2.3  | 5.8  | <0.1 | 6.3  | <0.1 | <0.1 | <0.1 | 1.4  | 1.2  |
| 35 | 12.1 | 25.8 | 8.4  | 3.3  | 12.8 | 16.9 | 3.7 | <0.1 | 1.8  | 5.5  | <0.1 | 7.3  | <0.1 | <0.1 | <0.1 | 1.2  | 1.4  |
| 36 | 14.3 | 43.4 | 9.5  | 3.0  | 0.4  | 10.7 | 6.8 | <0.1 | <0.1 | 0.8  | <0.1 | 8.3  | <0.1 | <0.1 | <0.1 | 2.4  | 0.5  |
| 37 | 15.6 | 33.7 | 8.2  | 4.3  | 6.9  | 14.7 | 5.5 | 2.6  | <0.1 | 0.7  | <0.1 | 7.4  | <0.1 | <0.1 | <0.1 | <0.1 | 0.5  |
| 38 | 9.1  | 46.2 | 7.9  | 1.8  | 4.4  | 7.9  | 7.9 | <0.1 | 1.5  | 2.4  | <0.1 | 7.3  | 3.6  | <0.1 | <0.1 | <0.1 | 0.0  |
| 39 | 10.6 | 27.0 | 5.9  | <0.1 | 5.8  | 2.4  | 1.8 | <0.1 | <0.1 | <0.1 | <0.1 | 43.5 | 2.9  | <0.1 | <0.1 | <0.1 | 0.2  |
| 40 | 5.7  | 26.4 | 7.5  | <0.1 | 1.6  | <0.1 | 2.3 | <0.1 | <0.1 | <0.1 | <0.1 | 35.6 | <0.1 | 16.1 | 4.6  | <0.1 | 0.1  |
| 41 | 34.8 | 42.9 | 11.6 | 0.5  | 3.5  | 3.6  | 2.5 | <0.1 | <0.1 | <0.1 | <0.1 | 0.3  | <0.1 | <0.1 | <0.1 | <0.1 | 0.3  |
| 42 | 11.8 | 30.7 | 7.7  | 7.1  | 7.0  | 20.1 | 3.5 | 4.4  | <0.1 | 6.5  | <0.1 | <0.1 | <0.1 | <0.1 | <0.1 | <0.1 | 1.2  |
| 43 | 10.7 | 29.6 | 6.4  | 6.4  | 6.2  | 20.9 | 3.5 | 4.1  | <0.1 | 5.3  | <0.1 | 5.8  | <0.1 | <0.1 | <0.1 | <0.1 | 1.2  |

|    |      |      |      |      |      |      |     |      |      |      |      |      |      |      |      |      |     |
|----|------|------|------|------|------|------|-----|------|------|------|------|------|------|------|------|------|-----|
| 44 | 9.4  | 27.0 | 8.2  | 7.6  | 10.3 | 22.3 | 3.9 | 3.5  | <0.1 | 6.5  | <0.1 | <0.1 | <0.1 | <0.1 | <0.1 | <0.1 | 1.2 |
| 45 | 7.3  | 27.2 | 8.6  | 6.5  | 11.3 | 24.8 | 3.0 | 3.1  | <0.1 | 7.1  | <0.1 | <0.1 | <0.1 | <0.1 | <0.1 | <0.1 | 1.2 |
| 46 | 14.1 | 33.0 | 11.8 | 5.9  | 7.4  | 13.0 | 5.9 | 3.5  | <0.1 | 4.2  | <0.1 | <0.1 | <0.1 | <0.1 | <0.1 | <0.1 | 1.2 |
| 47 | 25.8 | 42.8 | 10.6 | 1.9  | 2.7  | 5.9  | 6.9 | <0.1 | <0.1 | 2.3  | <0.1 | <0.1 | <0.1 | <0.1 | <0.1 | <0.1 | 1.1 |
| 48 | 18.1 | 36.2 | 9.1  | 2.1  | 5.4  | 12.1 | 4.1 | <0.1 | 1.1  | 3.8  | <0.1 | 5.4  | 1.6  | <0.1 | <0.1 | <0.1 | 0.9 |
| 49 | 12.9 | 32.9 | 8.7  | 4.7  | 5.3  | 17.6 | 3.8 | <0.1 | 1.4  | 4.7  | <0.1 | 4.9  | 2.4  | <0.1 | <0.1 | <0.1 | 0.8 |
| 50 | 30.9 | 41.0 | 9.7  | 1.2  | 3.9  | 7.2  | 2.7 | <0.1 | 0.5  | 2.7  | <0.1 | <0.1 | <0.1 | <0.1 | <0.1 | <0.1 | 0.4 |
| 51 | 38.6 | 43.9 | 9.5  | <0.1 | 0.2  | 4.8  | 2.4 | <0.1 | <0.1 | <0.1 | <0.1 | <0.1 | <0.1 | <0.1 | <0.1 | <0.1 | 0.6 |
| 52 | 7.7  | 25.2 | 10.2 | 7.0  | 13.1 | 27.0 | 0.4 | <0.1 | <0.1 | 8.2  | <0.1 | <0.1 | <0.1 | <0.1 | <0.1 | <0.1 | 1.2 |
| 53 | 11.4 | 29.1 | 8.2  | 5.0  | 9.7  | 13.5 | 5.6 | <0.1 | 8.5  | 7.2  | <0.1 | 1.2  | <0.1 | <0.1 | <0.1 | <0.1 | 0.5 |
| 54 | 27.9 | 44.1 | 8.1  | 1.2  | 4.2  | 5.8  | 3.5 | <0.1 | 2.3  | 2.3  | <0.1 | <0.1 | <0.1 | <0.1 | <0.1 | <0.1 | 0.6 |
| 55 | 41.1 | 38.5 | 10.1 | <0.1 | 3.0  | 2.5  | 4.2 | <0.1 | <0.1 | <0.1 | <0.1 | <0.1 | <0.1 | <0.1 | <0.1 | <0.1 | 0.7 |
| 56 | 35.3 | 44.1 | 8.3  | <0.1 | 0.8  | 4.5  | 6.5 | <0.1 | <0.1 | <0.1 | <0.1 | 0.2  | <0.1 | <0.1 | <0.1 | <0.1 | 0.2 |

Table S3. Summarised results of the Fe mode of occurrence from Mojave Desert samples. N° is the sample number, FeT is the total Fe content in weight %, FeA is the exchangeable Fe and nano Fe oxides in weight %, FeD is the Fe in hematite and goethite in weight %, FeM is the Fe in magnetite in weight %, FeS is the Fe in Fe bearing minerals in weight %. The FeA %, FeD %, FeM %, FeS % are the percentage of Fe that is in that mode of occurrence according to the total Fe amount.

| N° | FeT  | FeA  | FeD   | FeM   | FeS   | FeA % | FeD % | FeM % | FeS % |
|----|------|------|-------|-------|-------|-------|-------|-------|-------|
| 1  | 3.64 | 0.06 | 0.473 | 0.038 | 3.069 | 1.6   | 13    | 1.0   | 84    |
| 2  | 1.38 | 0.02 | 0.207 | 0.016 | 1.137 | 1.4   | 15    | 1.2   | 82    |
| 3  | 3.09 | 0.06 | 0.467 | 0.028 | 2.535 | 1.9   | 15    | 0.92  | 82    |
| 4  | 1.36 | 0.02 | 0.181 | 0.015 | 1.144 | 1.5   | 13    | 1.1   | 84    |
| 5  | 2.54 | 0.04 | 0.347 | 0.022 | 2.131 | 1.6   | 14    | 0.87  | 84    |
| 6  | 1.19 | 0.02 | 0.146 | 0.021 | 1.003 | 1.7   | 12    | 1.8   | 84    |
| 7  | 5.24 | 0.21 | 0.839 | 0.096 | 4.095 | 4.0   | 16    | 1.8   | 78    |
| 8  | 3.4  | 0.05 | 0.492 | 0.066 | 2.792 | 1.5   | 14    | 1.9   | 82    |
| 9  | 2.08 | 0.05 | 0.27  | 0.036 | 1.724 | 2.4   | 13    | 1.7   | 83    |

|    |      |       |       |       |       |      |     |      |    |
|----|------|-------|-------|-------|-------|------|-----|------|----|
| 10 | 1.38 | 0.017 | 0.165 | 0.02  | 1.178 | 1.2  | 12  | 1.4  | 85 |
| 11 | 2.02 | 0.019 | 0.323 | 0.086 | 1.592 | 0.94 | 16  | 4.3  | 79 |
| 12 | 1.77 | 0.025 | 0.331 | 0.079 | 1.335 | 1.4  | 19  | 4.5  | 75 |
| 14 | 0.77 | 0.026 | 0.163 | 0.025 | 0.556 | 3.4  | 21  | 3.2  | 72 |
| 15 | 0.28 | 0.016 | 0.057 | 0.012 | 0.195 | 5.7  | 20  | 4.3  | 70 |
| 16 | 1.06 | 0.029 | 0.257 | 0.051 | 0.723 | 2.7  | 24  | 4.8  | 68 |
| 17 | 1.4  | 0.021 | 0.281 | 0.035 | 1.063 | 1.5  | 20  | 2.5  | 76 |
| 18 | 2    | 0.031 | 0.434 | 0.098 | 1.437 | 1.6  | 22  | 4.9  | 72 |
| 19 | 2.18 | 0.021 | 0.481 | 0.042 | 1.636 | 0.96 | 22  | 1.9  | 75 |
| 20 | 1.72 | 0.022 | 0.313 | 0.071 | 1.314 | 1.3  | 18  | 4.1  | 76 |
| 21 | 4.85 | 0.068 | 1.429 | 0.04  | 3.313 | 1.4  | 29  | 0.82 | 68 |
| 22 | 4.37 | 0.054 | 0.693 | 0.081 | 3.542 | 1.2  | 16  | 1.9  | 81 |
| 23 | 2.45 | 0.019 | 0.324 | 0.112 | 1.995 | 0.78 | 13  | 4.6  | 81 |
| 24 | 1.48 | 0.021 | 0.144 | 0.096 | 1.219 | 1.4  | 9.7 | 6.5  | 82 |
| 25 | 2.22 | 0.021 | 0.228 | 0.014 | 1.957 | 0.95 | 10  | 0.63 | 88 |
| 26 | 1.37 | 0.01  | 0.134 | 0.046 | 1.18  | 0.73 | 9.8 | 3.4  | 86 |
| 27 | 2.04 | 0.012 | 0.182 | 0.013 | 1.833 | 0.59 | 8.9 | 0.64 | 90 |
| 28 | 1.12 | 0.011 | 0.107 | 0.024 | 0.978 | 0.98 | 9.6 | 2.1  | 87 |
| 29 | 1.52 | 0.015 | 0.161 | 0.029 | 1.315 | 0.99 | 11  | 1.9  | 87 |
| 30 | 3.07 | 0.036 | 0.418 | 0.041 | 2.575 | 1.2  | 14  | 1.3  | 84 |
| 31 | 2.5  | 0.024 | 0.315 | 0.03  | 2.131 | 0.96 | 13  | 1.2  | 85 |
| 32 | 3.79 | 0.03  | 0.577 | 0.057 | 3.126 | 0.79 | 15  | 1.5  | 82 |
| 33 | 4.01 | 0.034 | 0.572 | 0.031 | 3.373 | 0.85 | 14  | 0.77 | 84 |
| 34 | 3.72 | 0.029 | 0.561 | 0.064 | 3.066 | 0.78 | 15  | 1.7  | 82 |
| 35 | 3.78 | 0.043 | 0.565 | 0.035 | 3.137 | 1.14 | 15  | 0.93 | 83 |

|    |      |       |       |       |       |      |     |      |    |
|----|------|-------|-------|-------|-------|------|-----|------|----|
| 36 | 2.73 | 0.026 | 0.374 | 0.057 | 2.273 | 0.95 | 14  | 2.1  | 83 |
| 37 | 4.15 | 0.083 | 0.588 | 0.059 | 3.42  | 2.0  | 14  | 1.4  | 82 |
| 38 | 2.34 | 0.041 | 0.306 | 0.029 | 1.964 | 1.8  | 13  | 1.2  | 84 |
| 39 | 0.56 | 0.005 | 0.037 | 0.014 | 0.504 | 0.89 | 6.6 | 2.5  | 90 |
| 40 | 0.52 | 0.004 | 0.044 | 0.007 | 0.465 | 0.77 | 8.5 | 1.3  | 89 |
| 41 | 0.8  | 0.005 | 0.067 | 0.031 | 0.697 | 0.62 | 8.4 | 3.9  | 87 |
| 42 | 3.63 | 0.108 | 0.891 | 0.098 | 2.533 | 3.0  | 25  | 2.7  | 70 |
| 43 | 4.69 | 0.102 | 0.811 | 0.095 | 3.682 | 2.2  | 17  | 2.0  | 79 |
| 44 | 5.15 | 0.113 | 0.945 | 0.099 | 3.993 | 2.2  | 18  | 1.9  | 78 |
| 45 | 5.26 | 0.125 | 0.961 | 0.1   | 4.074 | 2.4  | 18  | 1.9  | 77 |
| 46 | 4.26 | 0.106 | 0.643 | 0.044 | 3.467 | 2.5  | 15  | 1.0  | 81 |
| 47 | 3.41 | 0.055 | 0.243 | 0.026 | 3.086 | 1.6  | 7.1 | 0.76 | 90 |
| 48 | 2.81 | 0.049 | 0.43  | 0.076 | 2.255 | 1.7  | 15  | 2.7  | 80 |
| 49 | 3.55 | 0.064 | 0.614 | 0.052 | 2.82  | 1.8  | 17  | 1.5  | 79 |
| 50 | 2.09 | 0.028 | 0.327 | 0.042 | 1.693 | 1.3  | 16  | 2.0  | 81 |
| 51 | 1.25 | 0.014 | 0.253 | 0.061 | 0.922 | 1.1  | 20  | 4.9  | 74 |
| 52 | 2.09 | 0.099 | 1.05  | 0.102 | 0.839 | 4.7  | 50  | 4.9  | 40 |
| 53 | 3.52 | 0.065 | 0.501 | 0.085 | 2.869 | 1.8  | 14  | 2.4  | 82 |
| 54 | 1.25 | 0.043 | 0.319 | 0.037 | 0.851 | 3.4  | 26  | 3.0  | 68 |
| 55 | 3.52 | 0.017 | 0.12  | 0.006 | 3.377 | 0.48 | 3.4 | 0.17 | 96 |
| 56 | 5.29 | 0.021 | 0.164 | 0.024 | 5.081 | 0.40 | 3.1 | 0.45 | 96 |
